# Supplementary material for: Prenatal Intervention with Partial Meal Replacement Improves Micronutrient Intake of Pregnant Women with Obesity
Source: MDPI journal article supplement (doi:10.3390/nu11051071), 2019-05-14
Supplement: s1 [file s1]

**Table S1.** Nutritional Composition of Healthy Beginnings/Comienzos Saludables Meal Replacements <sup>1</sup>.

| Serving size     | Organic liquid meal replacement<br>(Orgain, Inc <sup>2</sup> )<br>330 ml/11 fl oz | Powder meal replacement<br>(Ensure Original Nutrition Powder <sup>3</sup> )<br>237 ml/8 fl oz | Bar meal replacement<br>(PureFit Bar <sup>4</sup> )<br>56.7 g |
|------------------|-----------------------------------------------------------------------------------|-----------------------------------------------------------------------------------------------|---------------------------------------------------------------|
| Calories         | 250                                                                               | 250                                                                                           | 230                                                           |
| Total Fat (g)    | 7                                                                                 | 6                                                                                             | 7                                                             |
| Sat Fat (g)      | 1                                                                                 | 1                                                                                             | 0.5                                                           |
| Cholesterol (mg) | 20                                                                                | <5                                                                                            | 0                                                             |
| Sodium (mg)      | 260                                                                               | 190                                                                                           | 150                                                           |
| Potassium (mg)   | 320                                                                               | 390                                                                                           | 140                                                           |
| Total Carb (g)   | 32                                                                                | 41                                                                                            | 24                                                            |
| Fiber (g)        | 2                                                                                 | 1                                                                                             | 3                                                             |
| Sugars (g)       | 12                                                                                | 22                                                                                            | 13                                                            |
| Protein (g)      | 16                                                                                | 9                                                                                             | 18                                                            |
| <b>VITAMINS</b>  |                                                                                   |                                                                                               |                                                               |
| Vitamin A        | 25%                                                                               | 25%                                                                                           | 0%                                                            |
| Vitamin C        | 25%                                                                               | 25%                                                                                           | 2%                                                            |
| Vitamin D, µg    | 25%                                                                               | 10%                                                                                           | --                                                            |
| Vitamin E        | 25%                                                                               | 15%                                                                                           | --                                                            |
| Riboflavin       | 20%                                                                               | 30%                                                                                           | --                                                            |
| Vitamin B6       | 15%                                                                               | 25%                                                                                           | --                                                            |
| Vitamin B12      | 25%                                                                               | --                                                                                            | --                                                            |
| Pantothenic Acid | 25%                                                                               | 40%                                                                                           | --                                                            |
| Thiamine         | 10%                                                                               | 35%                                                                                           | --                                                            |
| Niacin           | 20%                                                                               | 15%                                                                                           | --                                                            |
| Folate           | 25%                                                                               | 25%                                                                                           | --                                                            |
| Biotin           | 10%                                                                               | 25%                                                                                           | --                                                            |
| <b>MINERALS</b>  |                                                                                   |                                                                                               |                                                               |
| Calcium, mg      | 40%                                                                               | 15%                                                                                           | 6%                                                            |
| Iron, mg         | 2%                                                                                | 10%                                                                                           | 20%                                                           |
| Iodine           | 25%                                                                               | 20%                                                                                           | --                                                            |
| Phosphorus       | 30%                                                                               | 8%                                                                                            | 15%                                                           |
| Magnesium        | 20%                                                                               | 10%                                                                                           | 2%                                                            |
| Copper           | 25%                                                                               | 15%                                                                                           | --                                                            |
| Zinc             | 25%                                                                               | 20%                                                                                           | --                                                            |

Abbreviations: g = grams; mg = milligrams; Sat = saturated; Carb = carbohydrates. <sup>1</sup> Approximately 80% of the study's meal replacements purchases were for the organic meal replacement product (Orgain, Inc); 15% were for the bar meal replacement (PureFit Bar); and, 4% were for the powder meal replacement (Ensure Original Nutrition Powder); the remaining 1% of purchases were for a liquid shake marketed for individuals with diabetes (Glucerna; data not shown). <sup>2</sup> Nutritional information for the organic liquid meal replacement (Orgain) was accessed on 2/27/19 at: <http://orgain.com/products/original-organic-nutritional-shake/>. <sup>3</sup> Nutritional information for the powder meal replacement (Ensure Original Nutrition Powder) prepared with water was accessed on 2/27/19 at: <https://ensure.com/nutrition-products>. <sup>4</sup> Nutritional information for the bar meal replacement (PureFit) was accessed on 2/27/19 at: <https://purefit.com/pages/nutritional-information> and calculated based on ASA-24 values. Percent Daily Values are based on a 2,000 calorie diet for adults. As nutrient needs tend to be higher during pregnancy, values on the label may be lower for pregnant women.
